# Supplementary material for: Associations between Healthcare Resources and Healthy Life Expectancy: A Descriptive Study across Secondary Medical Areas in Japan
Source: PubMed Central journal article supplement (PMC7503367; doi:10.3390/ijerph17176301), 2020-08-29
Supplement: ijerph-17-06301-s001.pdf [file ijerph-17-06301-s001.pdf]

**Table S1.** Types of long-term care (Japanese care system).

| <b>Types of Long-Term Care</b> | <b>Indicative Conditions</b>                                                                                                                                                                           |
|--------------------------------|--------------------------------------------------------------------------------------------------------------------------------------------------------------------------------------------------------|
| Care Level 1                   | People face difficulty in performing essential daily life activities by themselves.                                                                                                                    |
| Care Level 2                   | People are in a state similar to that detailed under Care Level 1, but require more care to be able to perform essential daily life activities.                                                        |
| Care Level 3                   | Compared with the state of those in Care Level 2, people's ability to perform essential daily life and task- based activities are significantly lower. As a result, they require almost constant care. |
| Care Level 4                   | People are in a state similar to that detailed under Care Level 3, but their ability to act is lower. As a result, they face difficulty living without constant care.                                  |
| Care Level 5                   | People's ability to act is even lower than that of individuals in Care Level 4 category. As a result, they require almost constant care to live.                                                       |
